# Supplementary figures and images for: Synthesis of benzylcyanoborane adducts of amines and separation of their enantiomers; SN2 substitution at boron atom
Source: Royal Society of Chemistry journal article supplement (doi:10.1039/b006265k), 2000-01-01

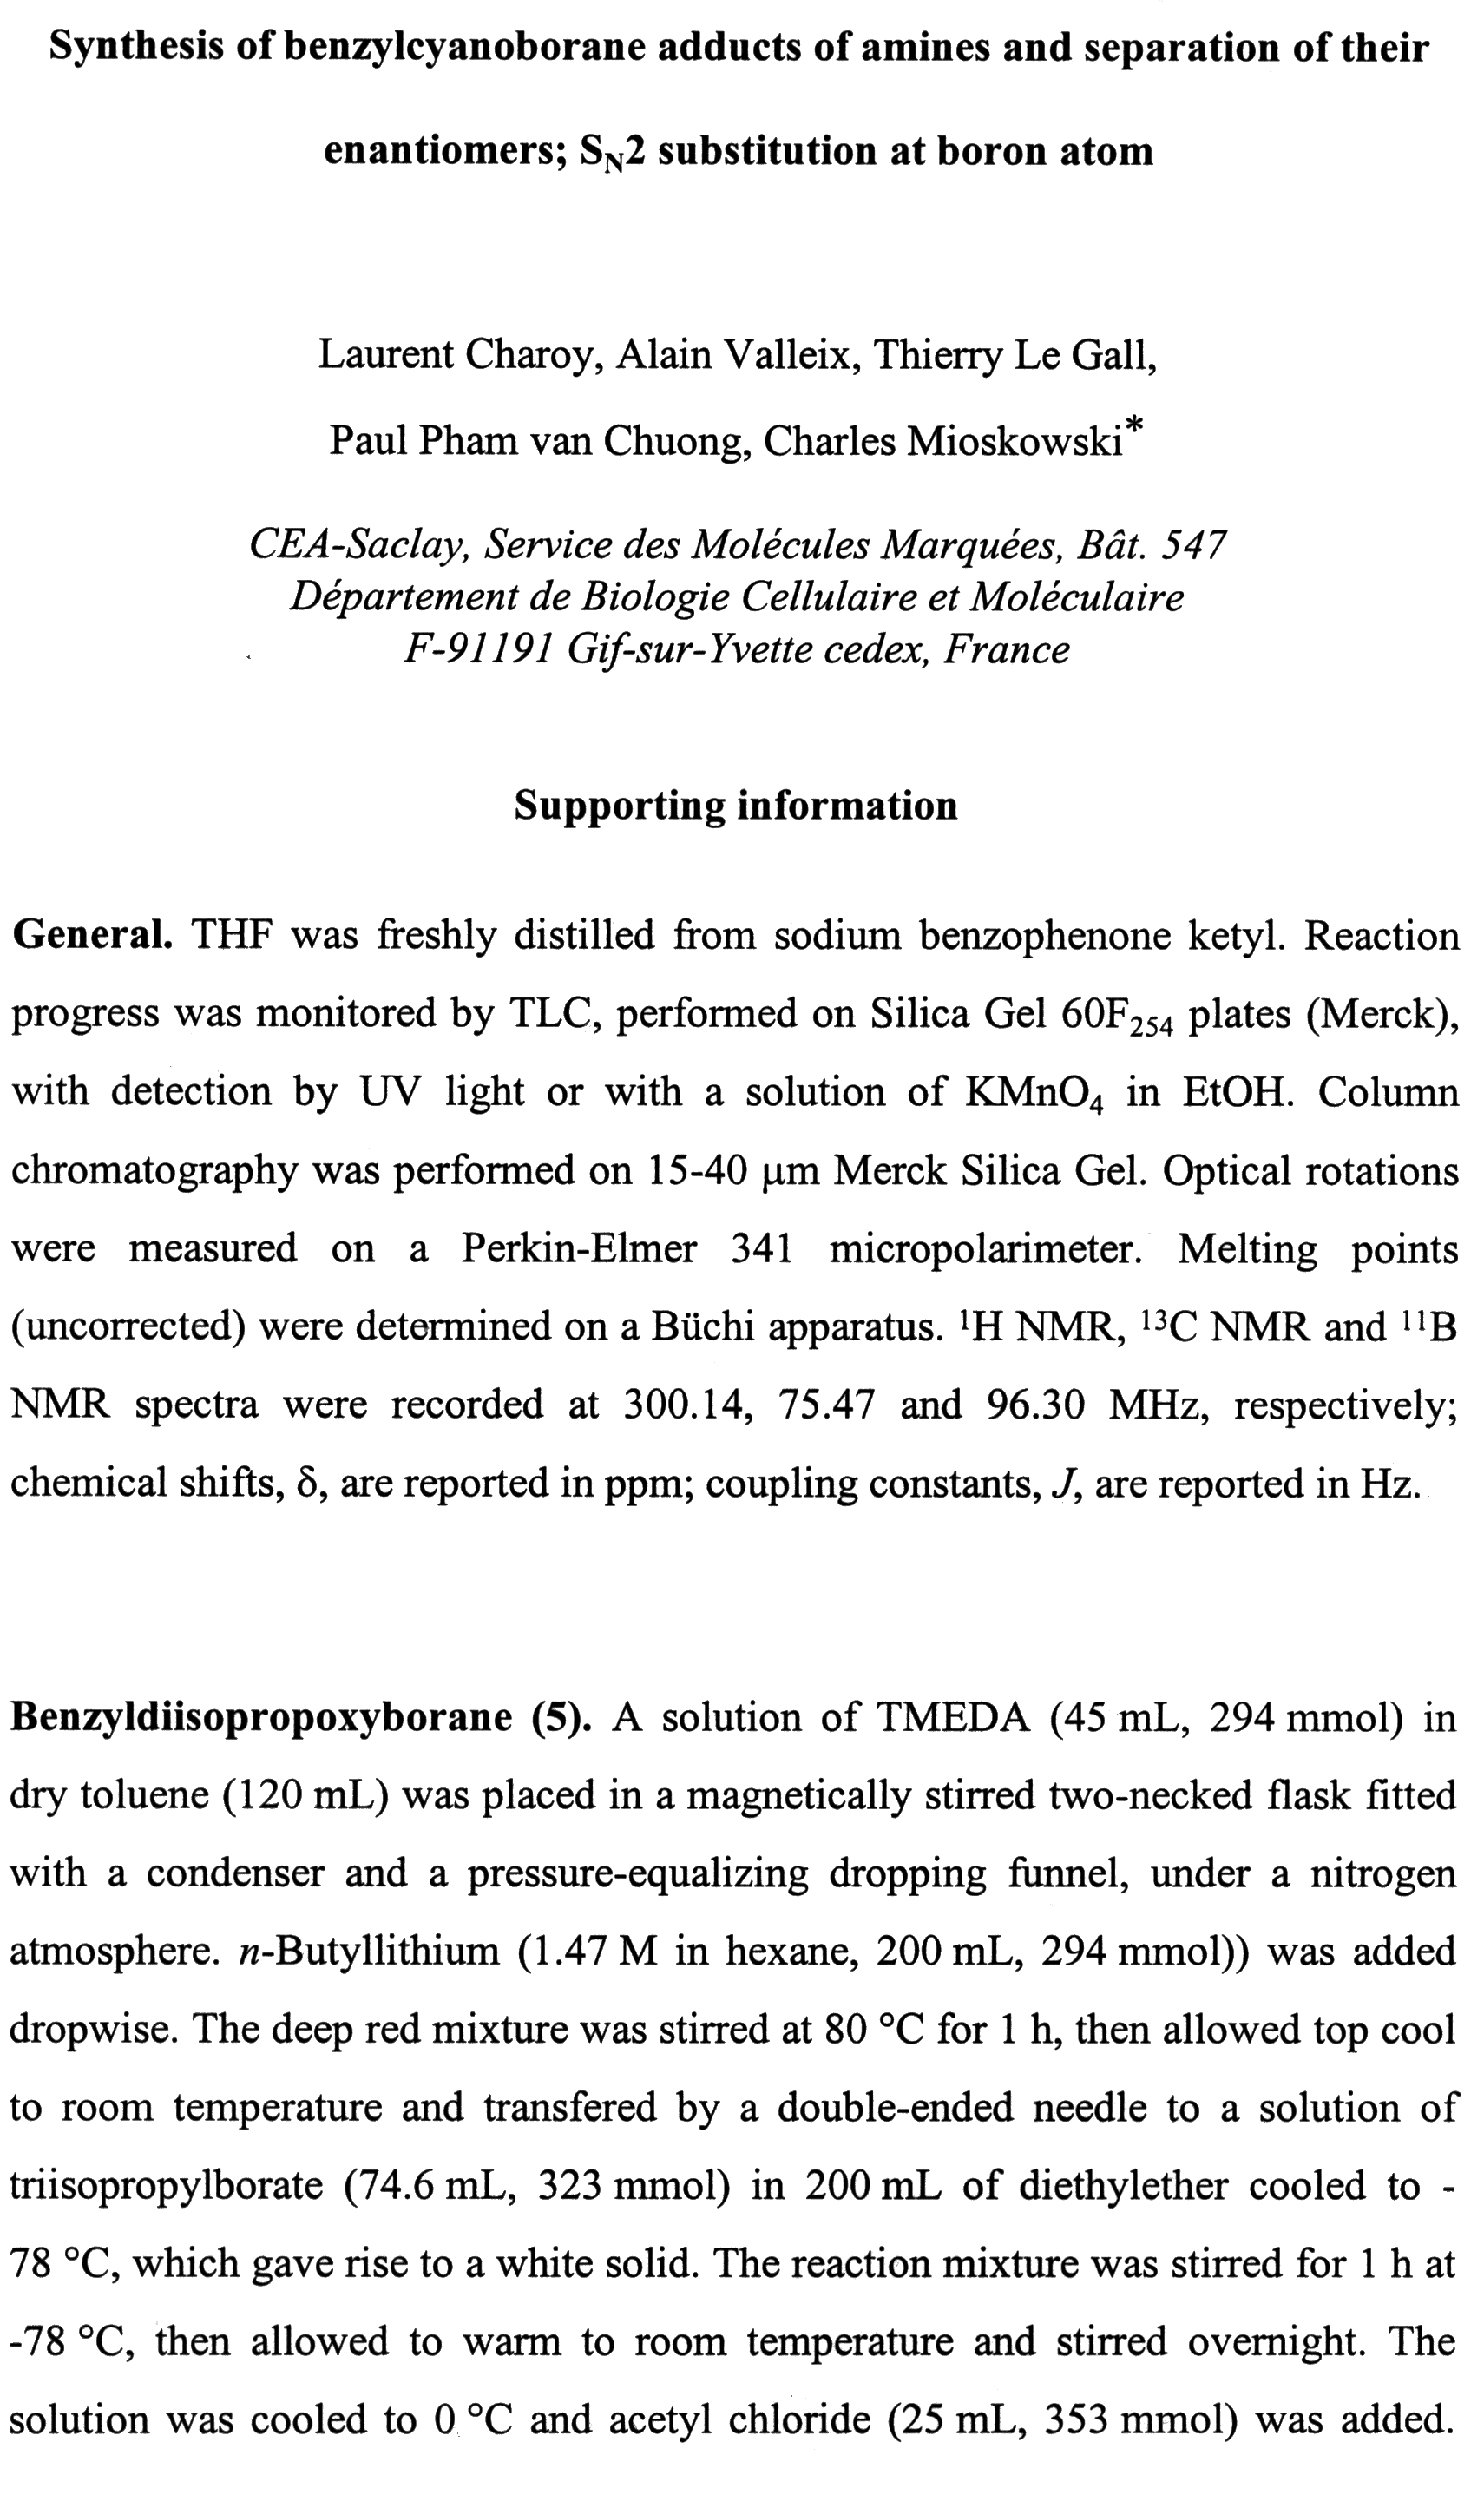


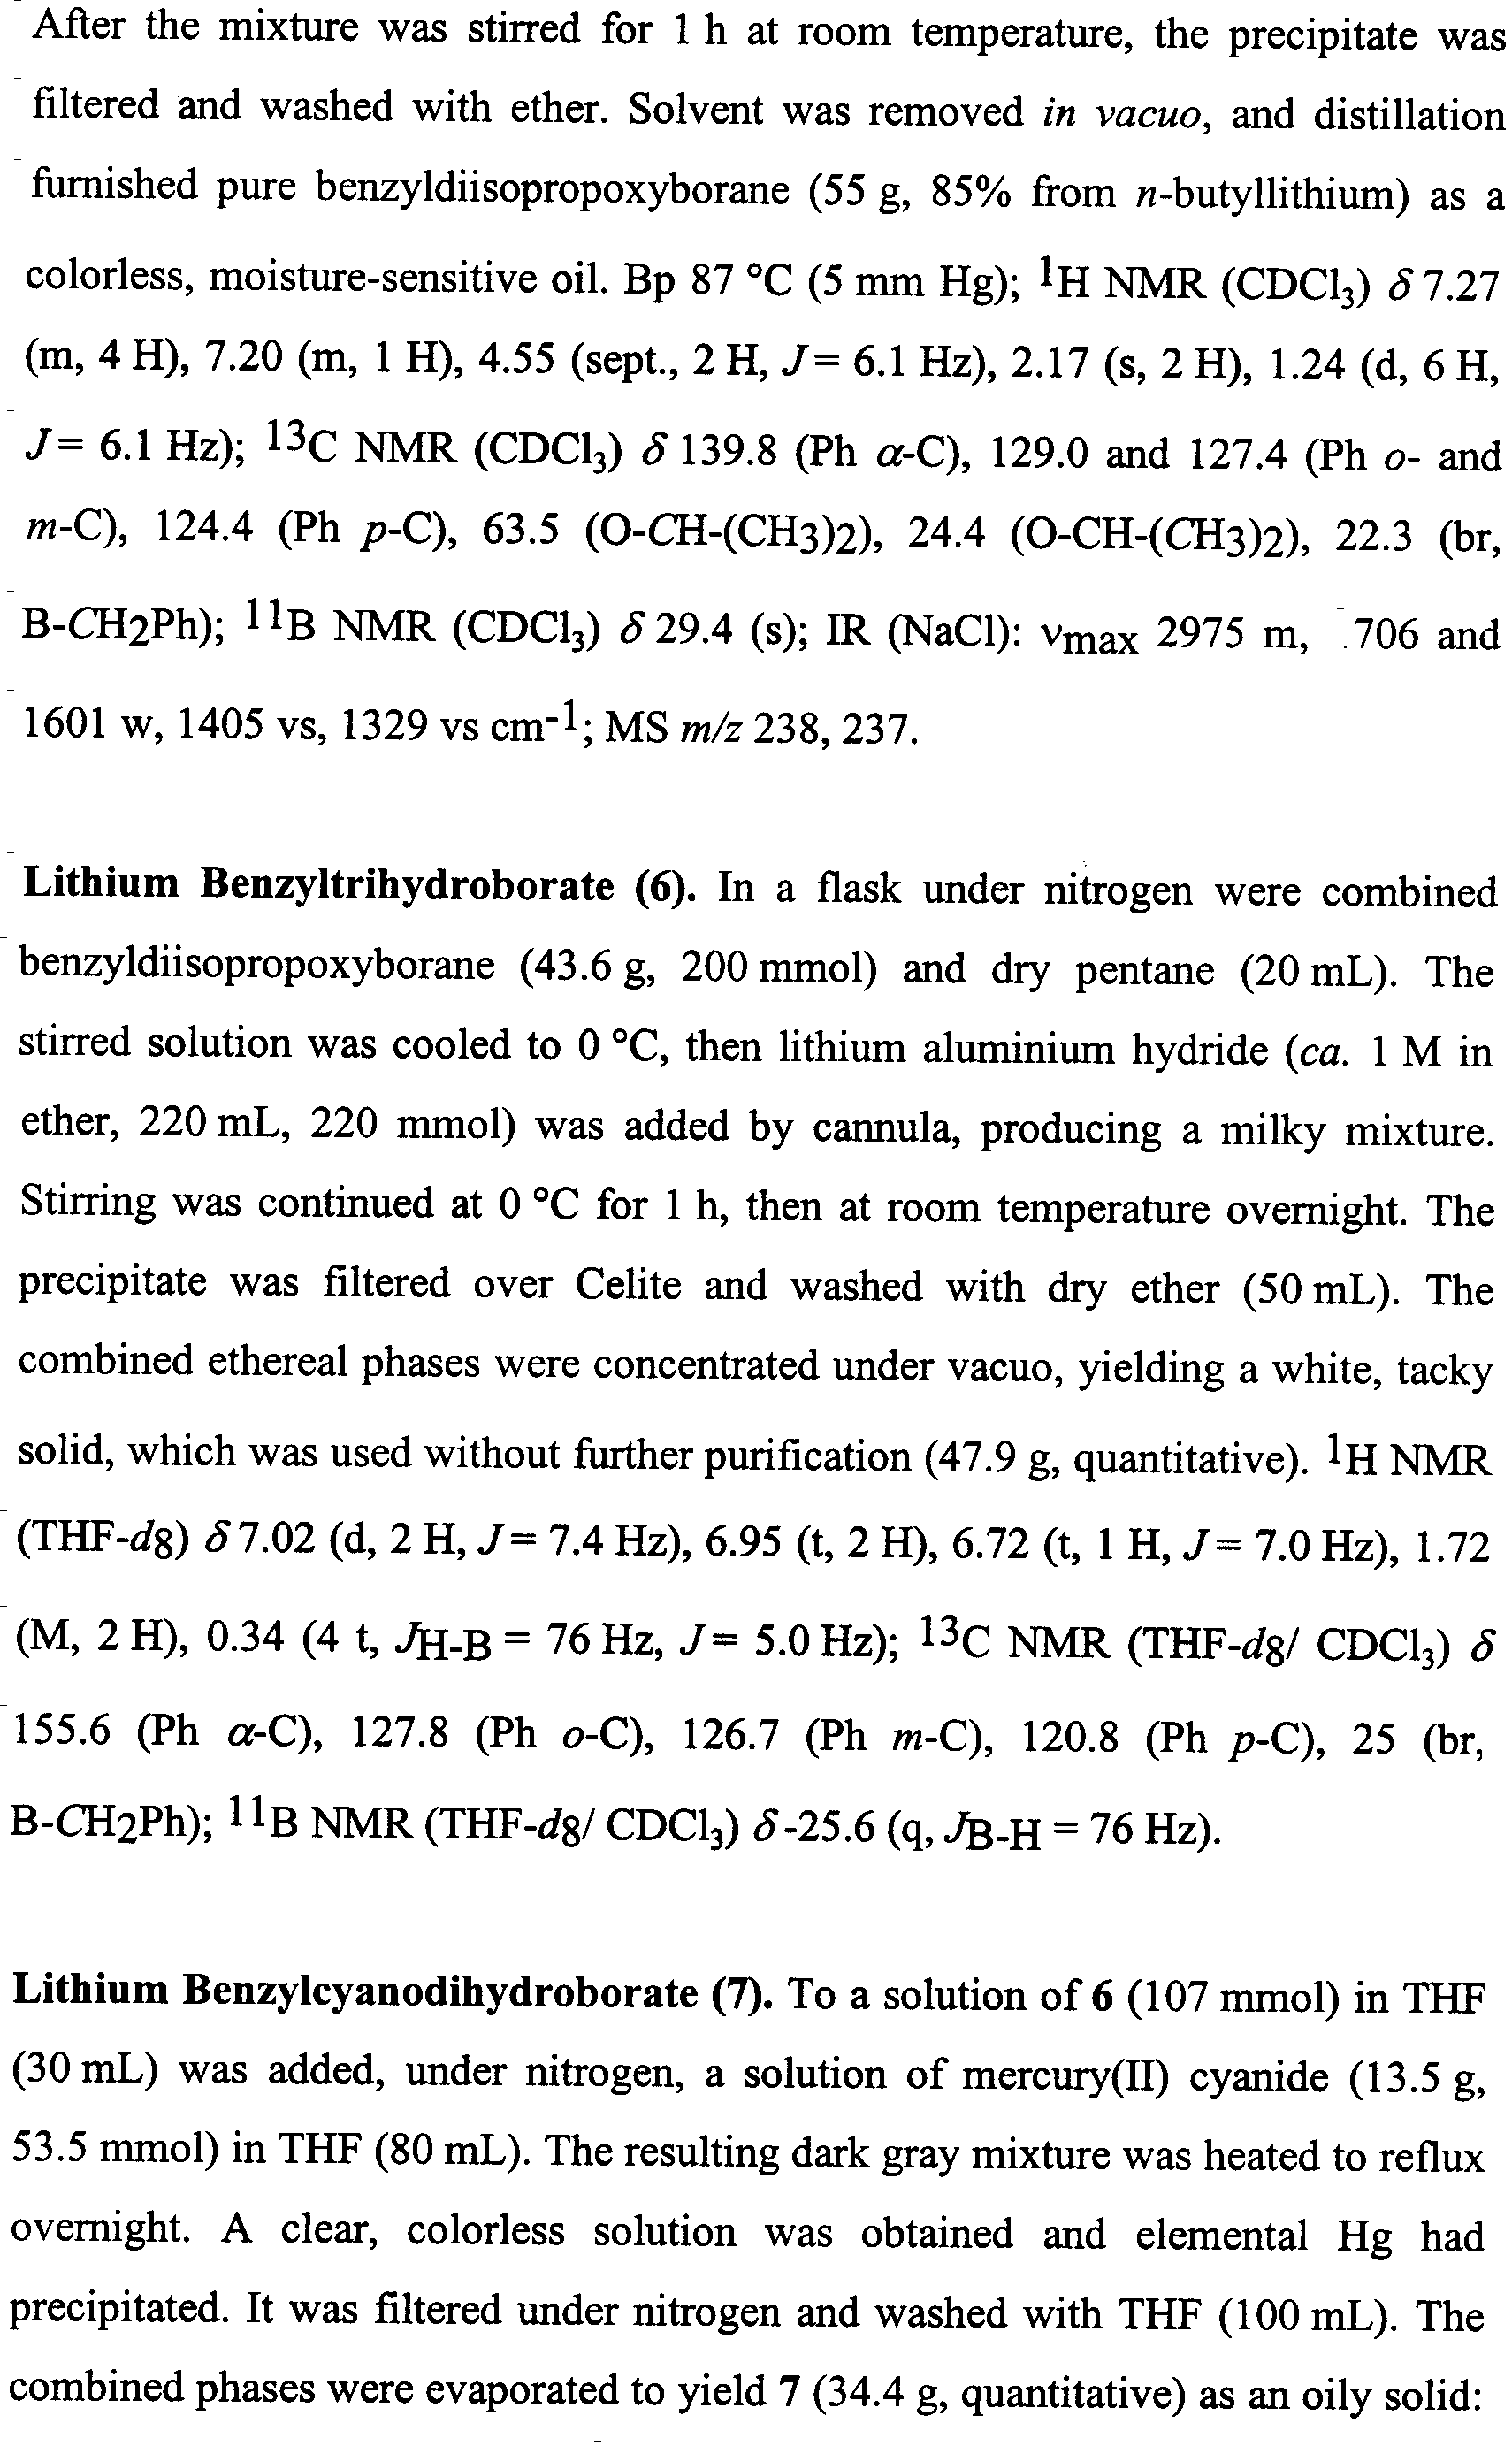


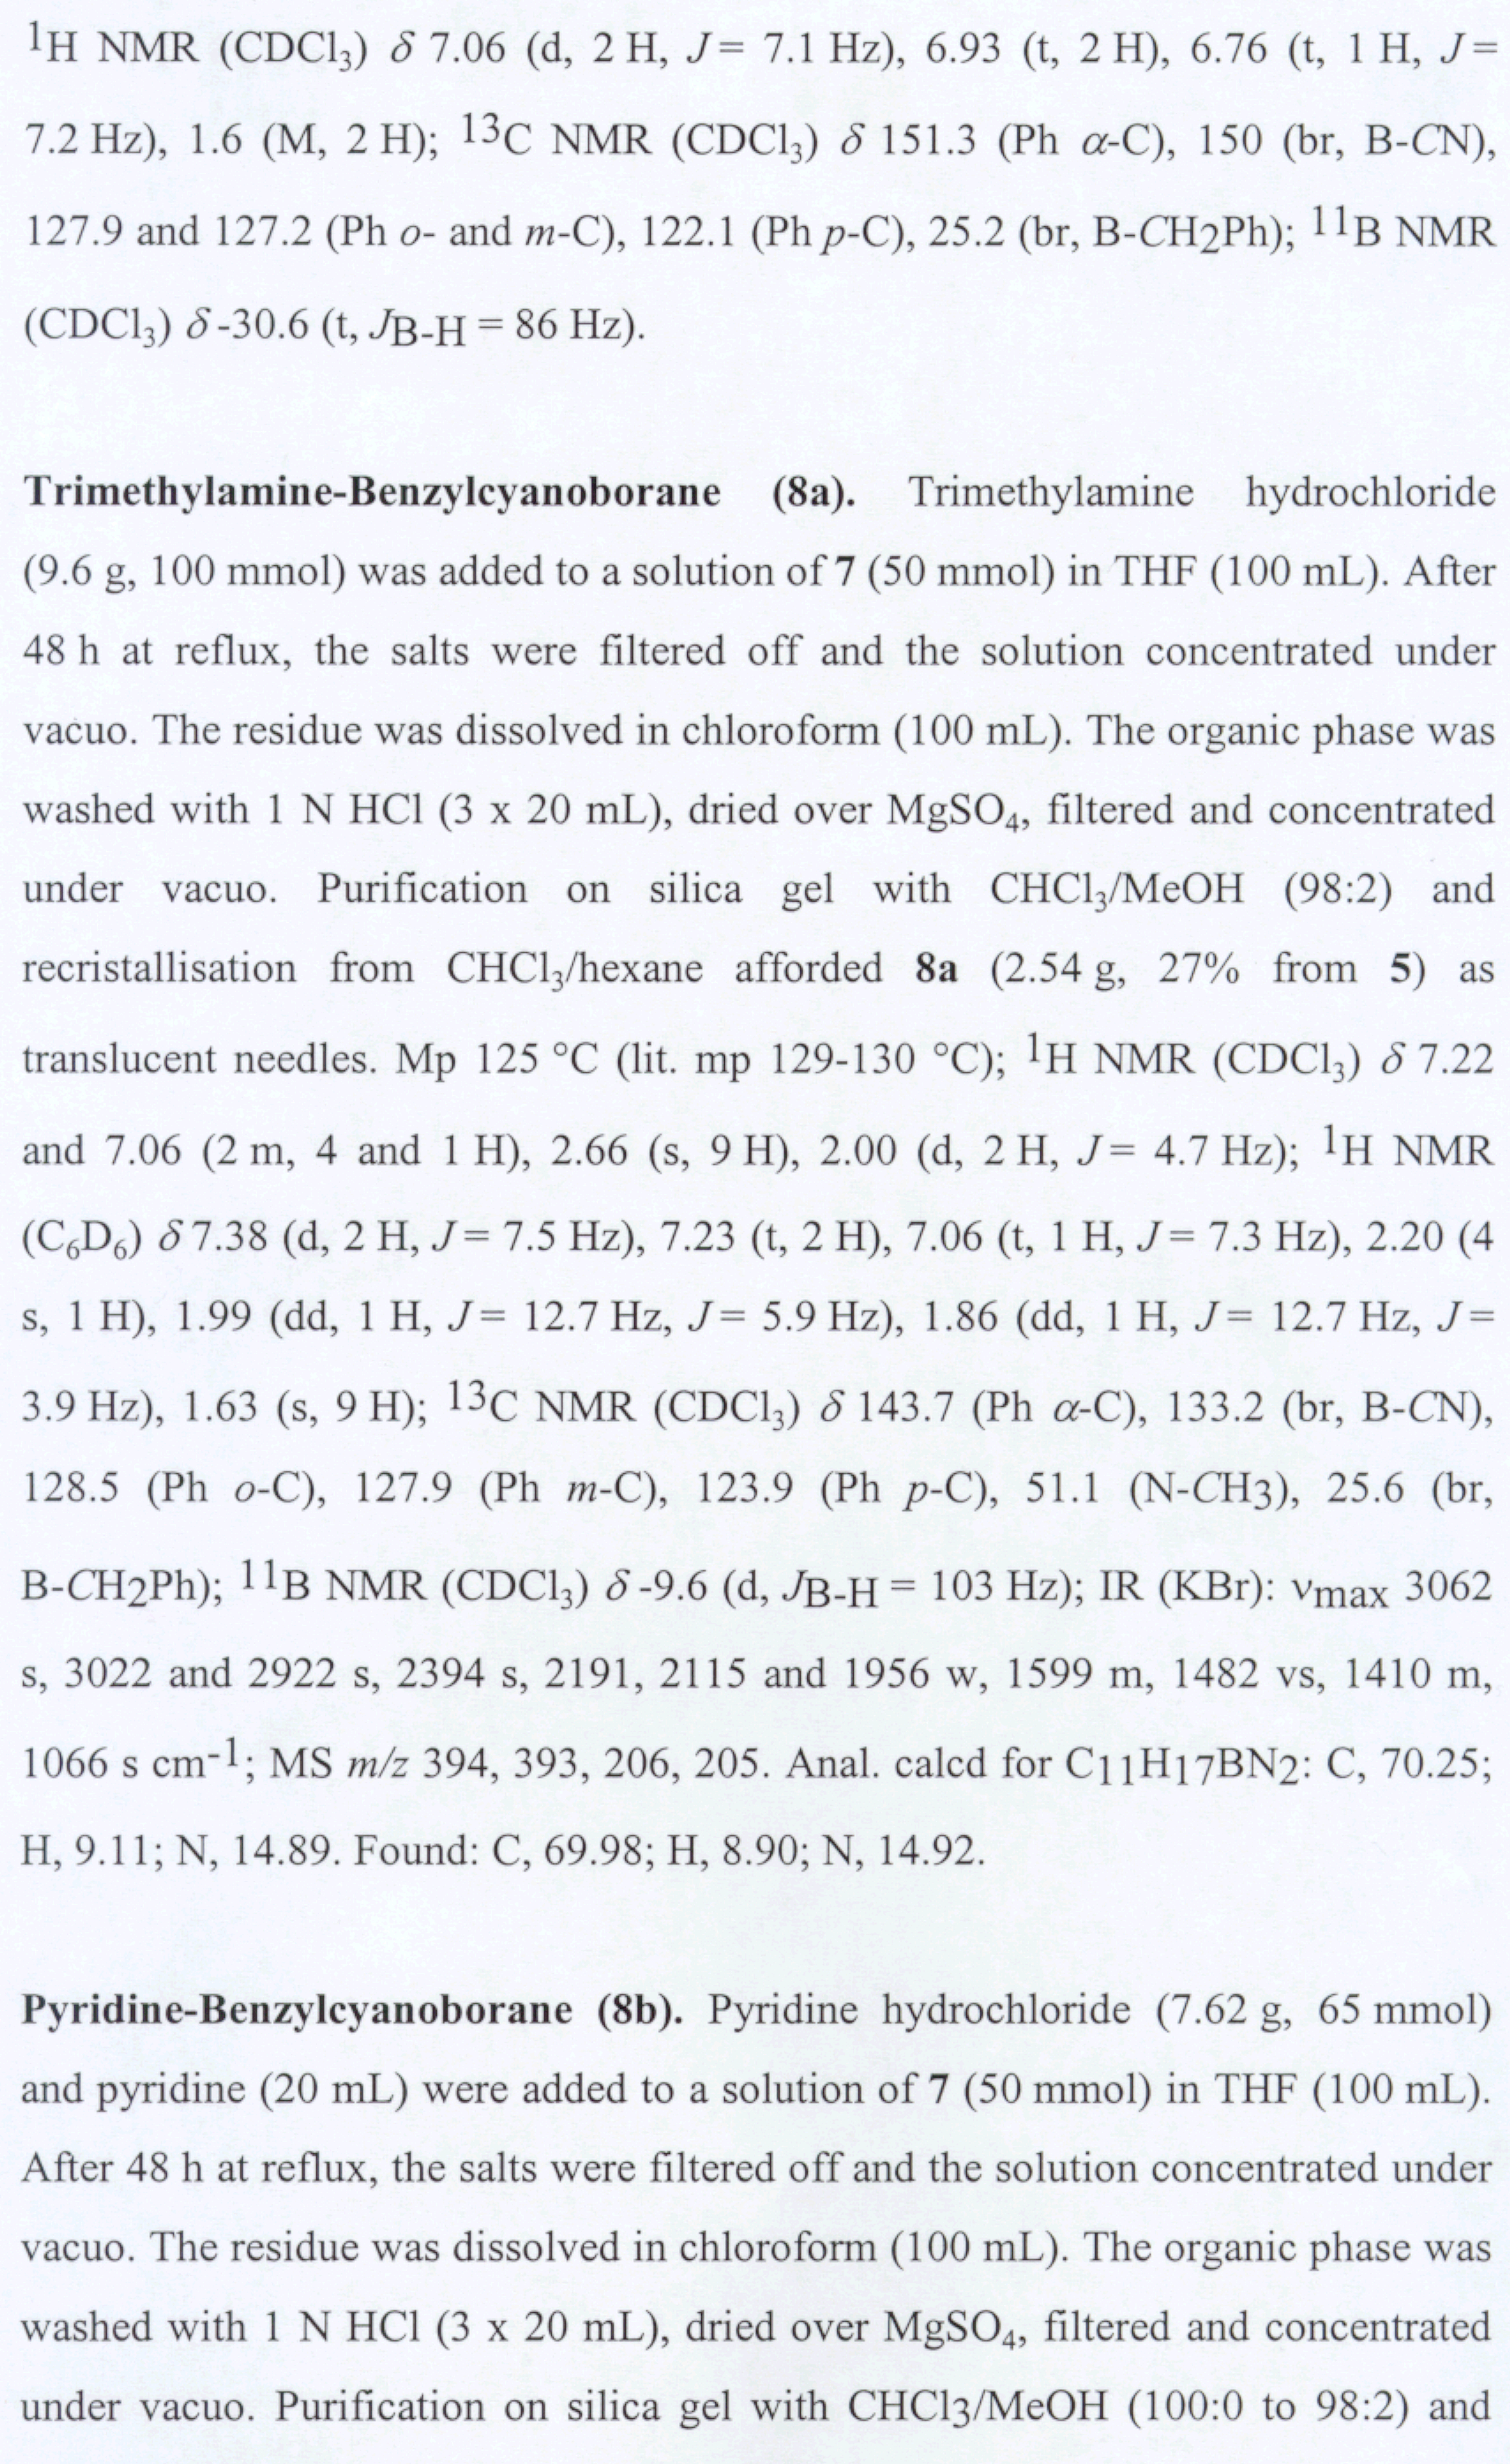


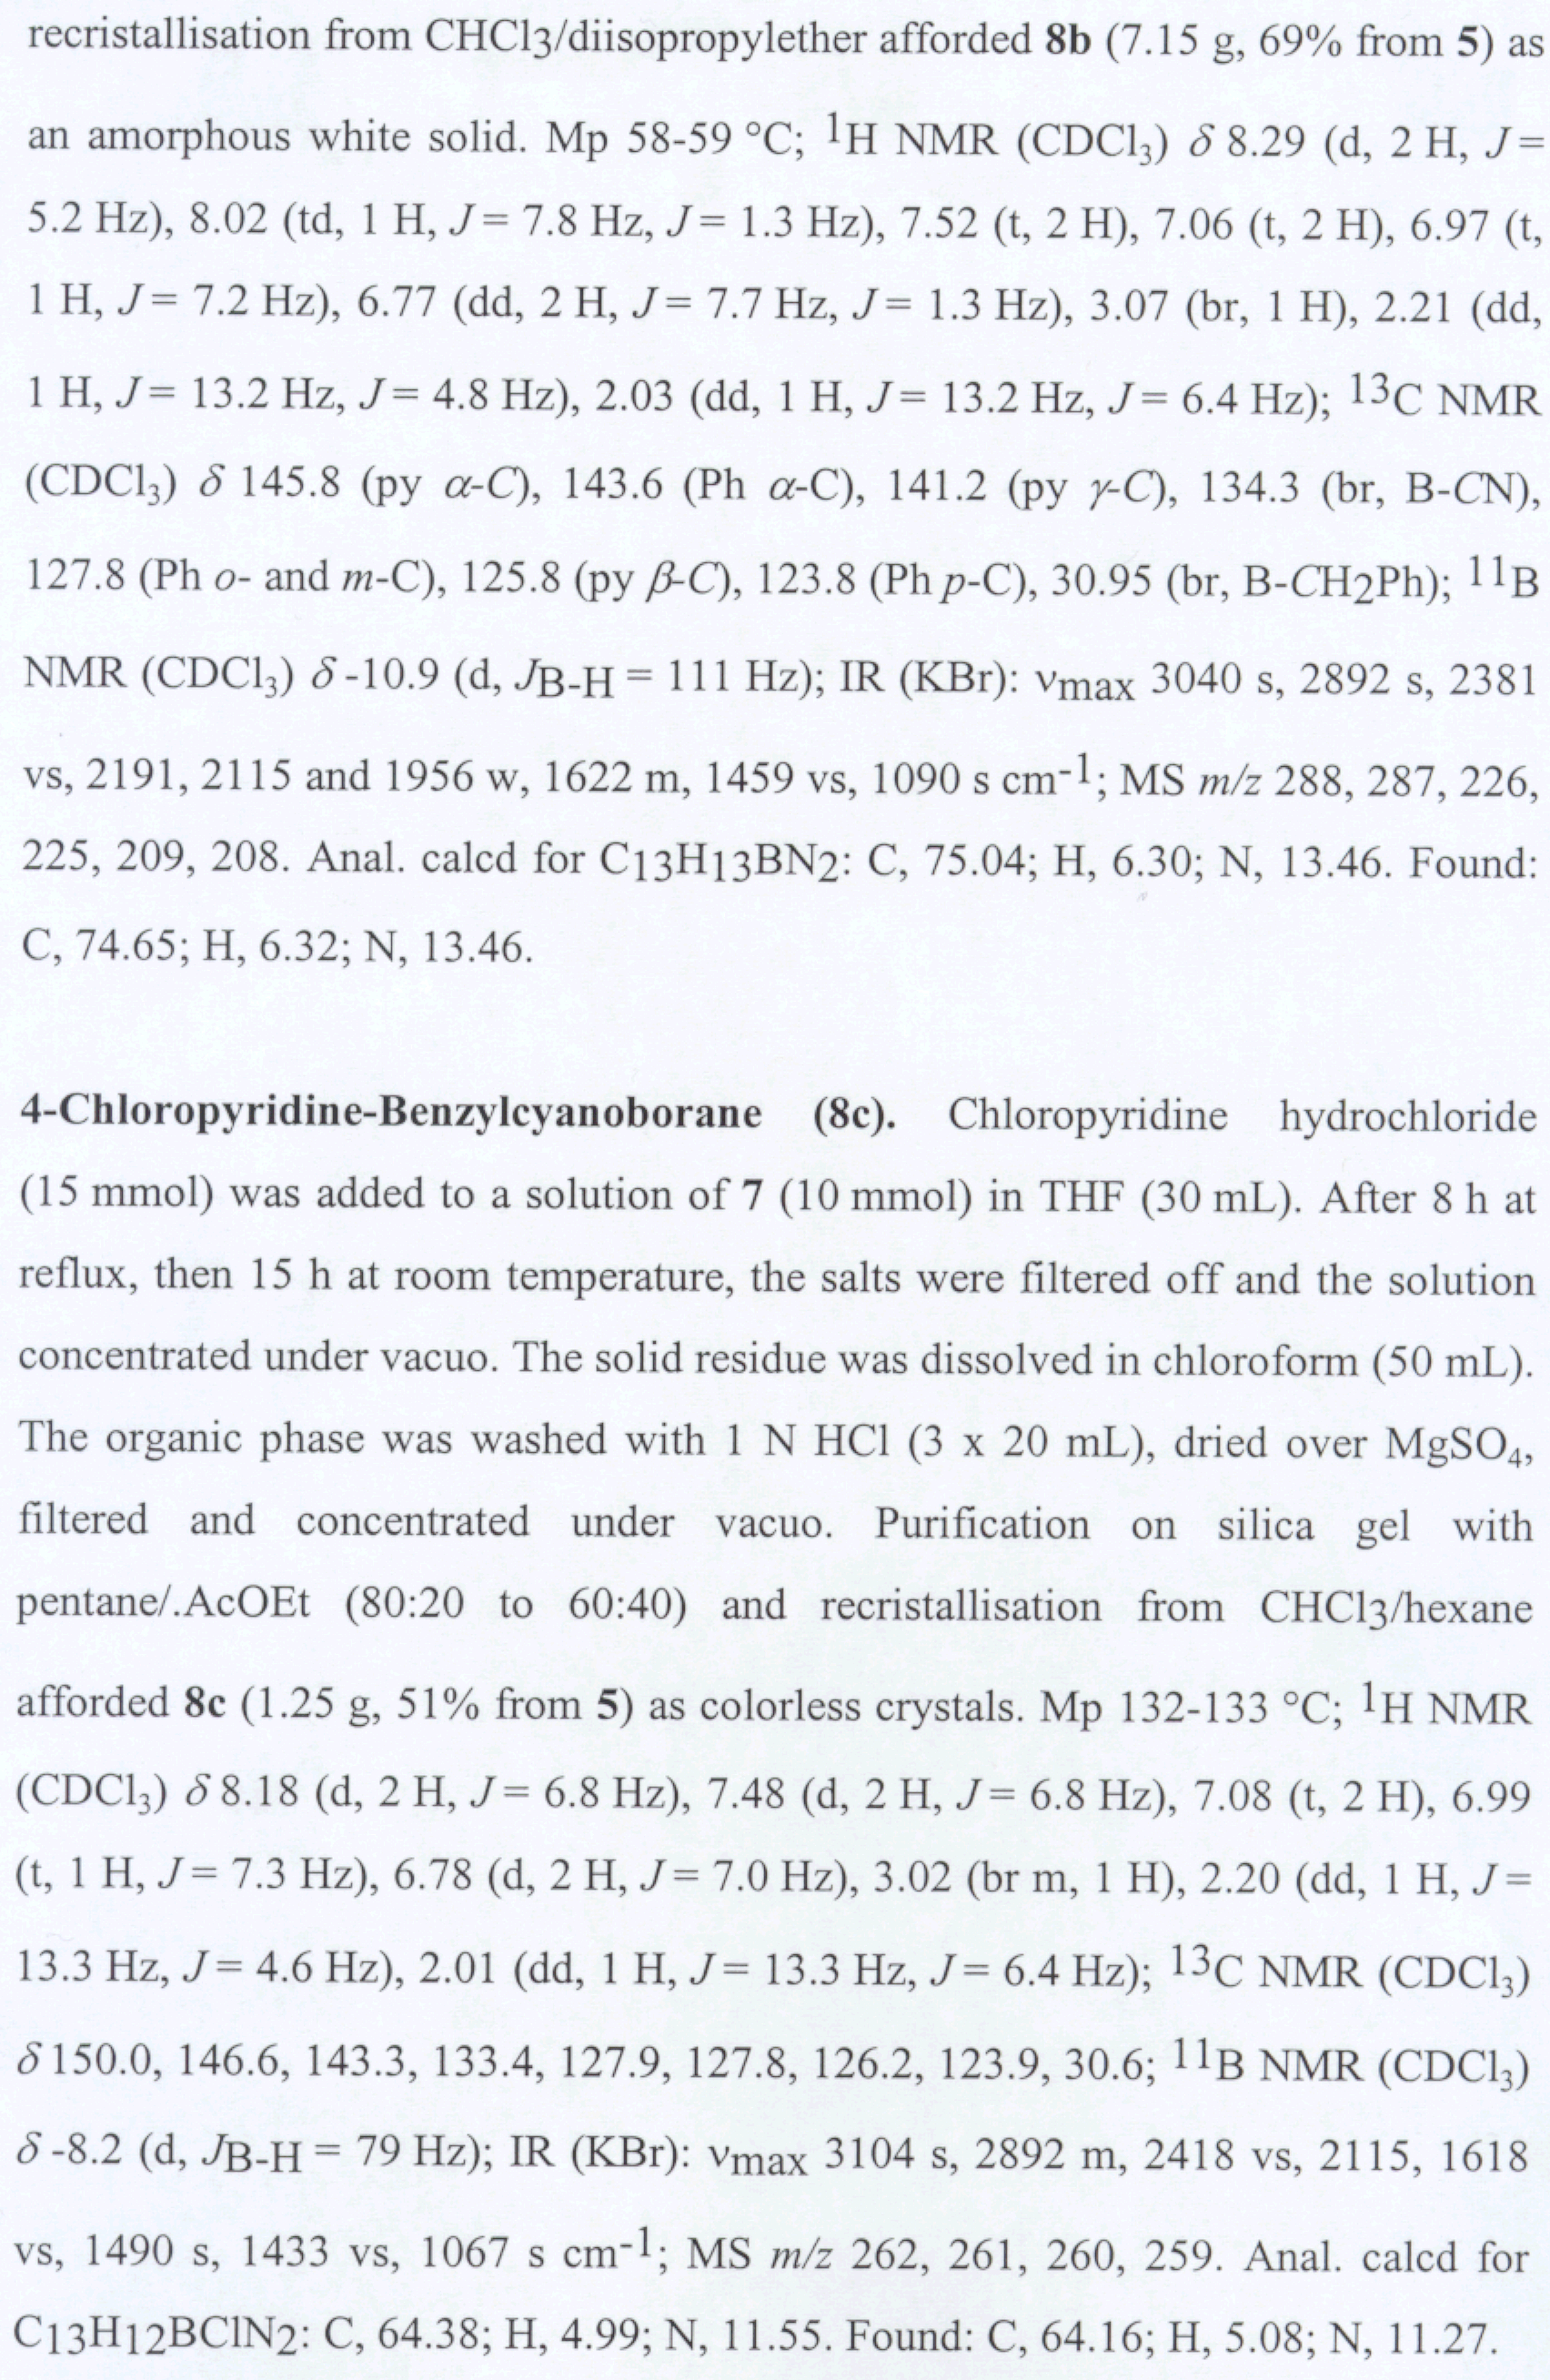


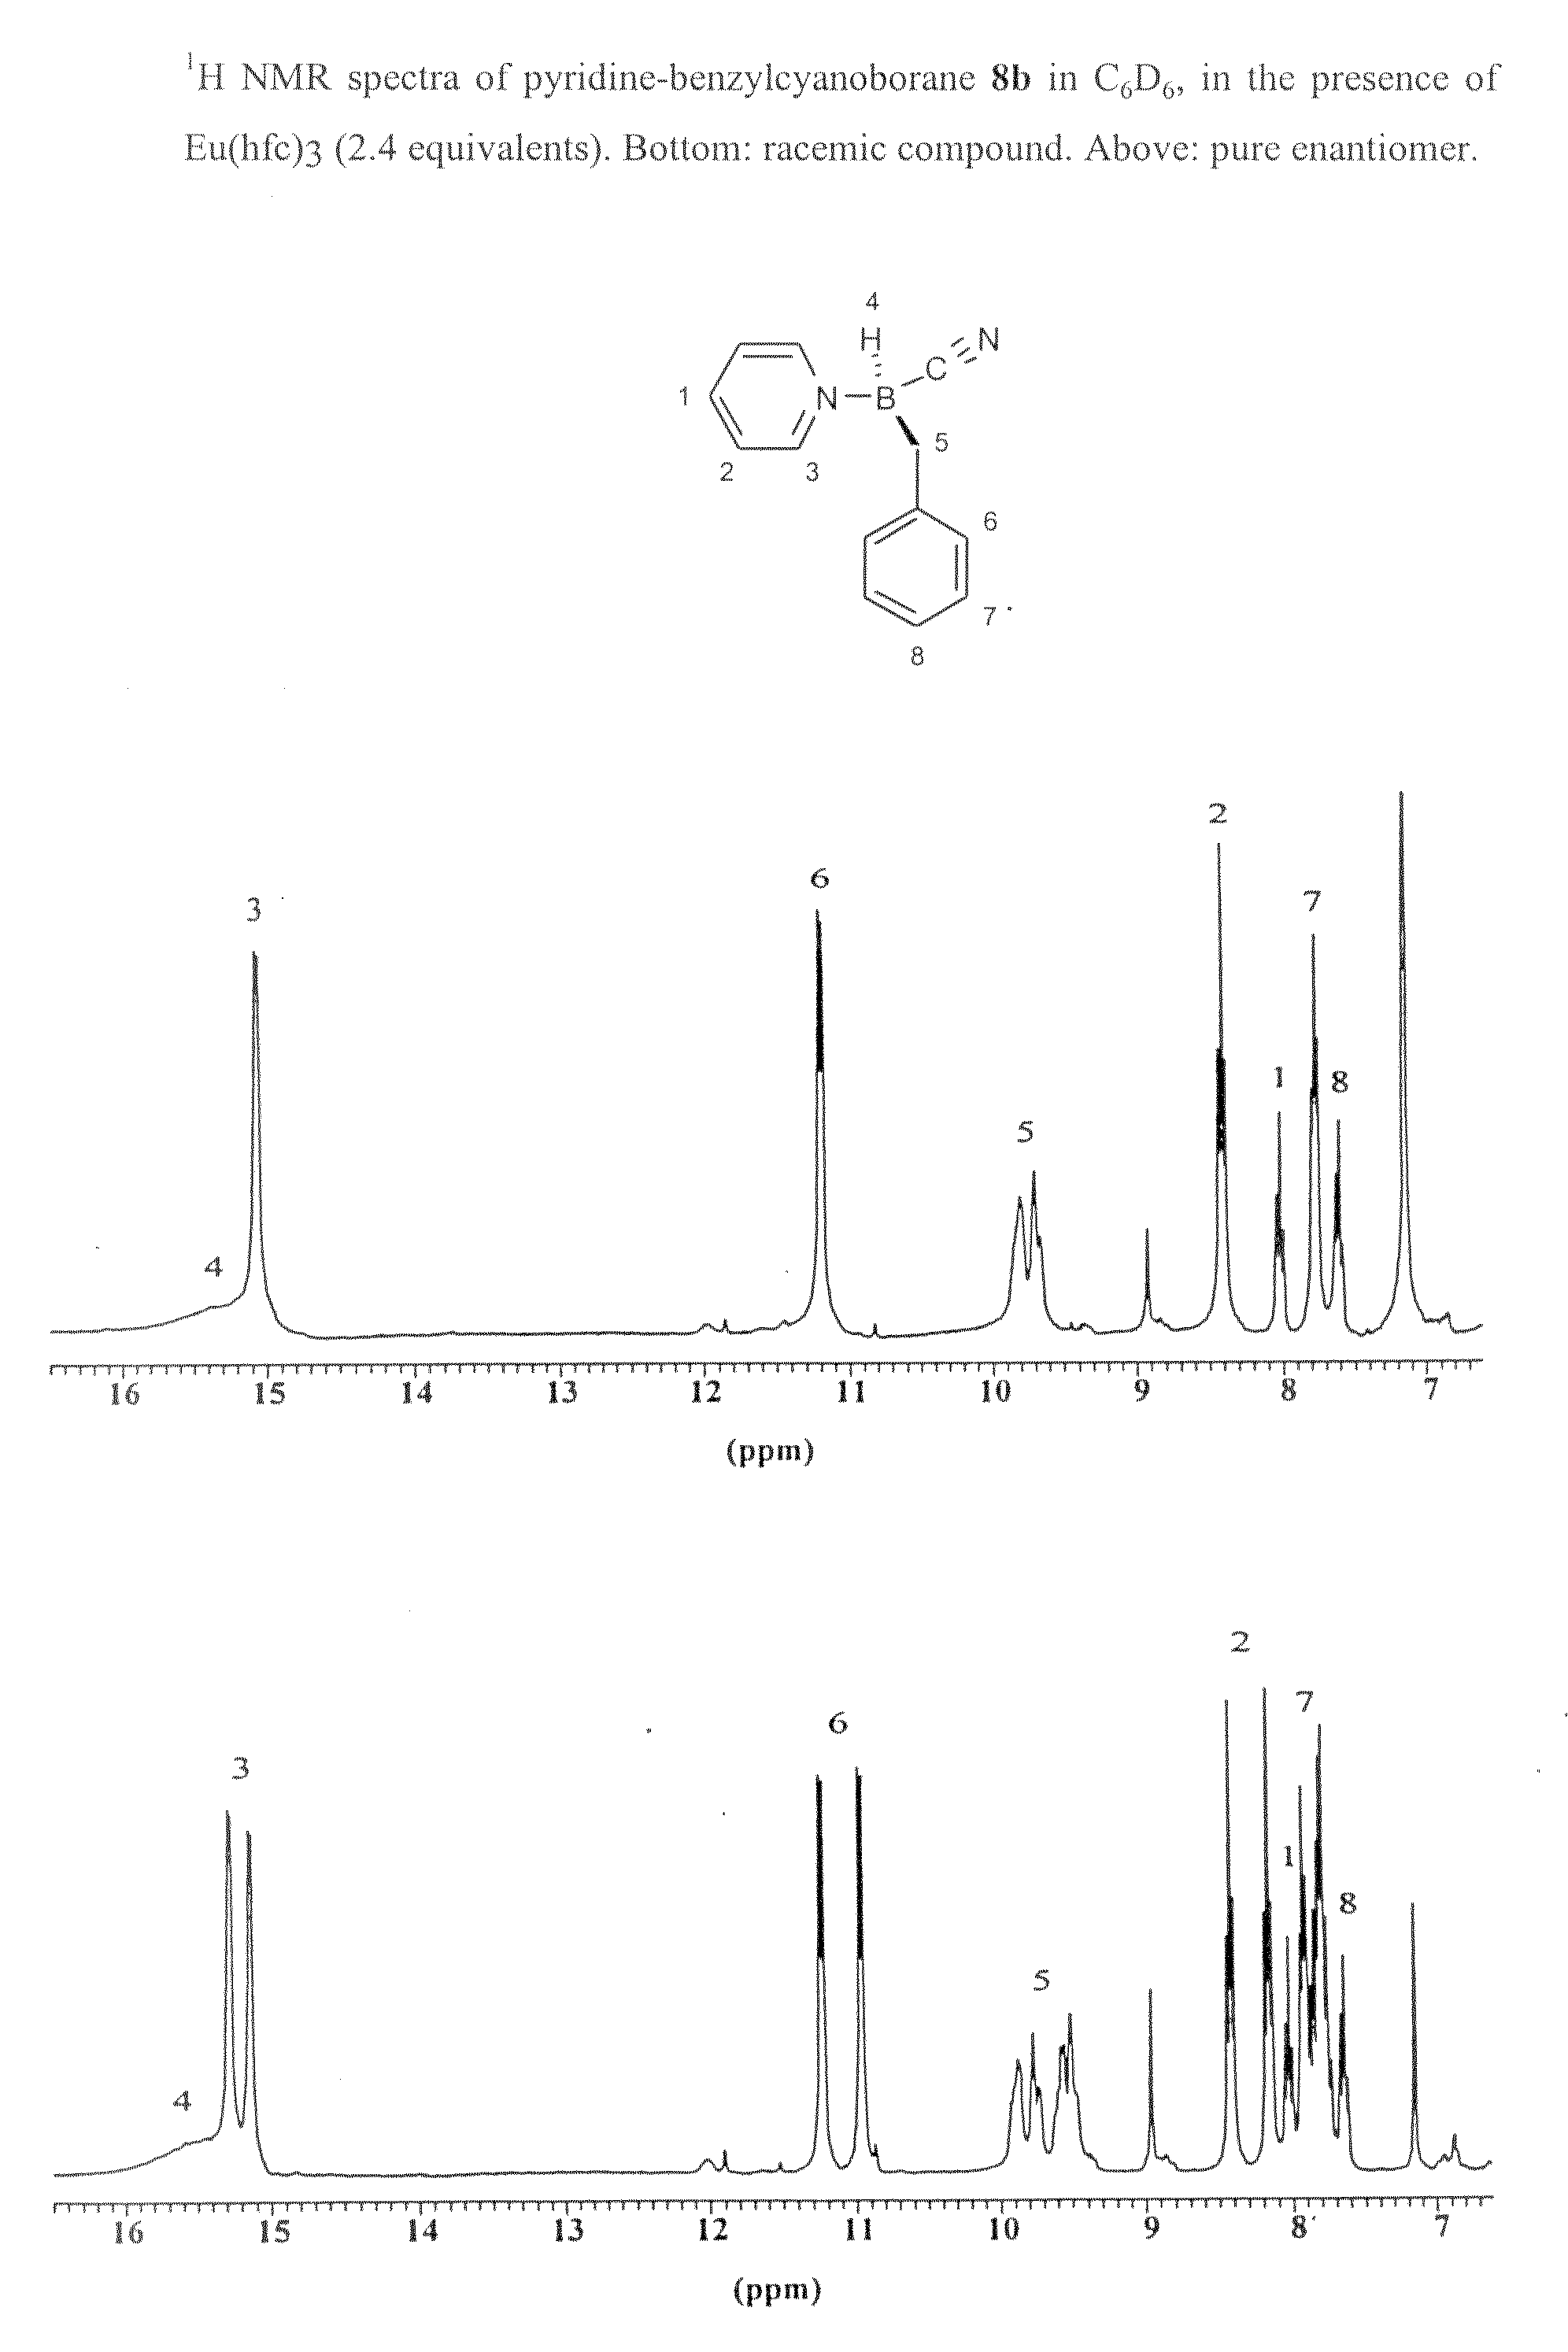

Supplement: b006265k1.doc [file b006265k1.doc]
